# Supplementary material
Source: PubMed Central journal article supplement (PMC7179320)
Supplement: AAC.02494-19-s0001.pdf [file AAC.02494-19-s0001.pdf]

**Table S1. Key predictors of multidrug resistance and the percentages in the bootstrap models.**

| Key predictor                                      | N     | %    | Selected |
|----------------------------------------------------|-------|------|----------|
| Prior use of piperacillin/tazobactam               | 10000 | 100  | Yes      |
| Prior use of antipseudomonal carbapenems           | 10000 | 99.4 | Yes      |
| Age                                                | 10000 | 83.1 | Yes      |
| Urinary catheter                                   | 10000 | 82.3 | Yes      |
| Diabetes mellitus                                  | 10000 | 77.4 | No       |
| Underlying disease                                 | 10000 | 74.4 | Yes      |
| Sex                                                | 10000 | 71   | Yes      |
| Prior fluoroquinolone prophylaxis                  | 10000 | 70.2 | Yes      |
| Prior bloodstream infection during hospitalization | 10000 | 63.8 | No       |
| Septic shock                                       | 10000 | 57.7 | No       |
| Prior orotraqueal intubation (7 days)              | 10000 | 56.9 | No       |
| Prior hospital admission (3 months)                | 10000 | 56.6 | No       |
| Severe mucosity last 3days                         | 10000 | 55   | No       |
| High-risk bloodstream infection                    | 10000 | 54.4 | No       |
| Prior use of ceftriaxone                           | 10000 | 54.3 | No       |
| Cerebral vascular disease                          | 10000 | 50.5 | No       |
| MASCC risk index score (value)                     | 10000 | 44.9 | No       |
| Prior therapy with fluoroquinolones                | 10000 | 42.1 | No       |
| Comorbidities                                      | 10000 | 42.1 | No       |
| Blood pressure <=90 mmHg                           | 10000 | 38.1 | No       |
| Hematopoietic stem cell transplant                 | 10000 | 36.7 | No       |
| Nosocomial acquisition                             | 10000 | 36.5 | No       |
| Pneumonia                                          | 10000 | 32.8 | No       |
| Prior use of amoxicillin/clavulanate               | 10000 | 29.9 | No       |
| Chronic obstructive pulmonary disease              | 10000 | 28   | No       |
| Solid organ transplant                             | 10000 | 27.7 | No       |
| HIV infection                                      | 10000 | 26.5 | No       |
| Chronic heart disease                              | 10000 | 26.1 | No       |
| Asthma                                             | 10000 | 26   | No       |
| Prior use of ertapenem                             | 10000 | 24.7 | No       |
| High-risk MASCC index score                        | 10000 | 24.3 | No       |

|                                             |       |      |    |
|---------------------------------------------|-------|------|----|
| Chronic renal disease                       | 10000 | 24.3 | No |
| Chronic liver disease                       | 10000 | 22.9 | No |
| Systemic inflammatory disease               | 10000 | 22.7 | No |
| Prior intensive care unit admission         | 10000 | 22   | No |
| Prior use of antipseudomonal cephalosporins | 10000 | 21.7 | No |
| Thyroid disease                             | 10000 | 21.5 | No |
| Corticosteroids (30 days)                   | 10000 | 19.3 | No |

Figure S1

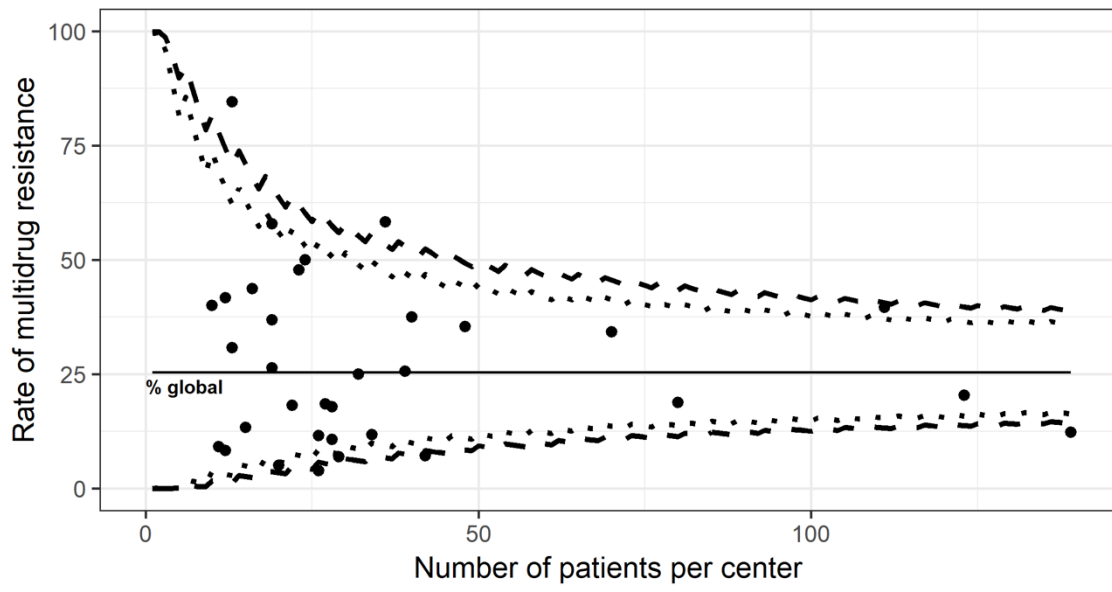

## TRIPOD Checklist: Prediction Model Development and Validation

| Section/Topic                | Checklist Item |     |                                                                                                                                                                                                       | Page            |
|------------------------------|----------------|-----|-------------------------------------------------------------------------------------------------------------------------------------------------------------------------------------------------------|-----------------|
| <b>Title and abstract</b>    |                |     |                                                                                                                                                                                                       |                 |
| Title                        | 1              | D;V | Identify the study as developing and/or validating a multivariable prediction model, the target population, and the outcome to be predicted.                                                          | 1               |
| Abstract                     | 2              | D;V | Provide a summary of objectives, study design, setting, participants, sample size, predictors, outcome, statistical analysis, results, and conclusions.                                               | 5               |
| <b>Introduction</b>          |                |     |                                                                                                                                                                                                       |                 |
| Background and objectives    | 3a             | D;V | Explain the medical context (including whether diagnostic or prognostic) and rationale for developing or validating the multivariable prediction model, including references to existing models.      | 7,8             |
|                              | 3b             | D;V | Specify the objectives, including whether the study describes the development or validation of the model or both.                                                                                     | 8               |
| <b>Methods</b>               |                |     |                                                                                                                                                                                                       |                 |
| Source of data               | 4a             | D;V | Describe the study design or source of data (e.g., randomized trial, cohort, or registry data), separately for the development and validation data sets, if applicable.                               | 9               |
|                              | 4b             | D;V | Specify the key study dates, including start of accrual; end of accrual; and, if applicable, end of follow-up.                                                                                        | 9               |
| Participants                 | 5a             | D;V | Specify key elements of the study setting (e.g., primary care, secondary care, general population) including number and location of centres.                                                          | 9               |
|                              | 5b             | D;V | Describe eligibility criteria for participants.                                                                                                                                                       | 9               |
|                              | 5c             | D;V | Give details of treatments received, if relevant.                                                                                                                                                     | NA              |
| Outcome                      | 6a             | D;V | Clearly define the outcome that is predicted by the prediction model, including how and when assessed.                                                                                                | 11              |
|                              | 6b             | D;V | Report any actions to blind assessment of the outcome to be predicted.                                                                                                                                | NA              |
| Predictors                   | 7a             | D;V | Clearly define all predictors used in developing or validating the multivariable prediction model, including how and when they were measured.                                                         | 12              |
|                              | 7b             | D;V | Report any actions to blind assessment of predictors for the outcome and other predictors.                                                                                                            | NA              |
| Sample size                  | 8              | D;V | Explain how the study size was arrived at.                                                                                                                                                            | 11              |
| Missing data                 | 9              | D;V | Describe how missing data were handled (e.g., complete-case analysis, single imputation, multiple imputation) with details of any imputation method.                                                  | 12              |
| Statistical analysis methods | 0a             | D   | Describe how predictors were handled in the analyses.                                                                                                                                                 | 12              |
|                              | 0b             | D   | Specify type of model, all model-building procedures (including any predictor selection), and method for internal validation.                                                                         | 12              |
|                              | 0c             | V   | For validation, describe how the predictions were calculated.                                                                                                                                         | 12              |
|                              | 0d             | D;V | Specify all measures used to assess model performance and, if relevant, to compare multiple models.                                                                                                   | 12              |
|                              | 0e             | V   | Describe any model updating (e.g., recalibration) arising from the validation, if done.                                                                                                               | NA              |
| Risk groups                  | 11             | D;V | Provide details on how risk groups were created, if done.                                                                                                                                             | NA              |
| Development vs. validation   | 12             | V   | For validation, identify any differences from the development data in setting, eligibility criteria, outcome, and predictors.                                                                         | NA              |
| <b>Results</b>               |                |     |                                                                                                                                                                                                       |                 |
| Participants                 | 3a             | D;V | Describe the flow of participants through the study, including the number of participants with and without the outcome and, if applicable, a summary of the follow-up time. A diagram may be helpful. | 13              |
|                              | 3b             | D;V | Describe the characteristics of the participants (basic demographics, clinical features, available predictors), including the number of participants with missing data for predictors and outcome.    | 12,13           |
|                              | 3c             | V   | For validation, show a comparison with the development data of the distribution of important variables (demographics, predictors and outcome).                                                        | Suppl. Material |
| Model development            | 4a             | D   | Specify the number of participants and outcome events in each analysis.                                                                                                                               | 13,14           |
|                              | 4b             | D   | If done, report the unadjusted association between each candidate predictor and outcome.                                                                                                              | NA              |
| Model specification          | 5a             | D   | Present the full prediction model to allow predictions for individuals (i.e., all regression coefficients, and model intercept or baseline survival at a given time point).                           |                 |
|                              | 5b             | D   | Explain how to use the prediction model.                                                                                                                                                              | Suppl. Material |
| Model performance            | 16             | D;V | Report performance measures (with CIs) for the prediction model.                                                                                                                                      | Figure 2        |
| Model-updating               | 17             | V   | If done, report the results from any model updating (i.e., model specification, model performance).                                                                                                   | NA              |
| <b>Discussion</b>            |                |     |                                                                                                                                                                                                       |                 |
| Limitations                  | 18             | D;V | Discuss any limitations of the study (such as nonrepresentative sample, few events per predictor, missing data).                                                                                      | 18              |
| Interpretation               | 9a             | V   | For validation, discuss the results with reference to performance in the development data, and any other validation data.                                                                             | 16,17           |
|                              | 9b             | D;V | Give an overall interpretation of the results, considering objectives, limitations, results from similar studies, and other relevant evidence.                                                        | 16-19           |

|                           |    |     |                                                                                                                               |       |
|---------------------------|----|-----|-------------------------------------------------------------------------------------------------------------------------------|-------|
| Implications              | 20 | D;V | Discuss the potential clinical use of the model and implications for future research.                                         | 16-19 |
| <b>Other information</b>  |    |     |                                                                                                                               |       |
| Supplementary information | 21 | D;V | Provide information about the availability of supplementary resources, such as study protocol, Web calculator, and data sets. | 15    |
| Funding                   | 22 | D;V | Give the source of funding and the role of the funders for the present study.                                                 | 22    |

\*Items relevant only to the development of a prediction model are denoted by D, items relating solely to a validation of a prediction model are denoted by V, and items relating to both are denoted D;V. We recommend using the TRIPOD Checklist in conjunction with the TRIPOD Explanation and Elaboration document.

## Tool to calculate de risk of multidrug resistance

To estimate the probability of developing multidrug resistance (MDR) of a particular patient:

$$P(\text{MDR}) = \left[ \frac{e^{\beta_0 + \sum_{j=1}^k \beta_j X_j}}{1 + e^{\beta_0 + \sum_{j=1}^k \beta_j X_j}} \right]$$

where  $\beta_0$  stands for the intercept value and  $\sum_{j=1}^k \beta_j X_j$  stands for the linear function of model predictors. Each predictor is multiplied by its corresponding  $\beta$  as in the table below.

For illustrative purposes, we calculate the multidrug-resistance risk for a 60-years old patient with prior use of piperacillin/tazobactam, urinary catheter in the previous 48 hours, with an hematologic underlying disease, with no prior use of anti-pseudomonal carbapenems and no prior fluoroquinolone prophylaxis:

| Key factor                                                                                                            | Beta        | Patient | Result                         |
|-----------------------------------------------------------------------------------------------------------------------|-------------|---------|--------------------------------|
| Prior piperacillin/tazobactam                                                                                         | 1.24891532  | Yes     | 1.24891532*1=1.24891532        |
| Prior fluoroquinolone prophylaxis                                                                                     | 1.0963422   | No      | 1.0963422*0=0                  |
| Urinary catheter                                                                                                      | 0.93336107  | Yes     | 0.93336107 *1=0.93336107       |
| Prior anti-pseudomonal carbapenems                                                                                    | 0.92899160  | No      | 0.92899160*0=0                 |
| Hematologic underlying disease                                                                                        | 0.73714079  | Yes     | 0.73714079*1=0.73714079        |
| Age                                                                                                                   | -0.01720178 | 60      | -0.01720178*60=-1.032107       |
| $\sum_{j=1}^k \beta_j X_j$                                                                                            |             |         | 1.88731                        |
| $\beta_0 + \sum_{j=1}^k \beta_j X_j$                                                                                  |             |         | -1.65226955+1.88731= 0.2350405 |
| $\exp\left(\beta_0 + \sum_{j=1}^k \beta_j X_j\right)$                                                                 |             |         | $\exp(0.2350405) = 1.26496$    |
| $\frac{\exp\left(\beta_0 + \sum_{j=1}^k \beta_j X_j\right)}{1 + \exp\left(\beta_0 + \sum_{j=1}^k \beta_j X_j\right)}$ |             |         | 1.26496/(1+1.26496)= 0.5584911 |
| $P(\text{MDR})$                                                                                                       |             |         | 0.5585                         |
| Given 100 people with this profile, 56 will develop MDR                                                               |             |         |                                |

Based on this, the risk of this patient of developing multidrug resistance is **56%**.

To account for the cluster effect of center, a mixed logistic regression model was used. Therefore, for each patient profile we can estimate several probabilities, one per each center. Since a patient can only be attended in one center, we report three probabilities to show three different scenarios. One, where the patient is admitted in a center with a low rate of MDR (lower than 8%: mean rate minus one standard deviation), another where the patient is admitted in a center with an intermediate rate of MDR (between 8% and 46%: mean rate), and finally, another where the patient is admitted in a center with a high rate of MDR (higher than 46%: mean rate plus one standard deviation).

| <b>Type of centre</b>       | <b>Center MDR incidence</b> | <b>Probability of MDR</b> | <b>Given 100 people with this profile</b> |
|-----------------------------|-----------------------------|---------------------------|-------------------------------------------|
| Low MDR incidence center    | <8%                         | 0.3775                    | 38 will develop MDR                       |
| Medium MDR incidence center | 8%-46%                      | 0.5585                    | 56 will develop MDR                       |
| High MDR incidence center   | >46%                        | 0.7252                    | 73 will develop MDR                       |

### **Supplemental Figure Legends**

Figure S1. Multidrug resistance rates among *Pseudomonas aeruginosa* isolates by center, according to the number of patients included.
